# Supplementary material
Source: PubMed Central journal article supplement (PMC3962540)
Supplement: epi-9-297-s01.pdf [file epi-9-297-s01.pdf]

## **Supplemental Material to:**

**Kristin E Williams, Douglas L Anderton, Maxwell P Lee,  
Brian T Pentecost, and Kathleen F Arcaro**

**High-density array analysis of DNA methylation in  
tamoxifen-resistant breast cancer cell lines**

**Epigenetics 2013; 9(2)**

**<http://dx.doi.org/10.4161/epi.27111>**

**[http://www.landesbioscience.com/journals/epigenetics/  
article/27111/](http://www.landesbioscience.com/journals/epigenetics/article/27111/)**

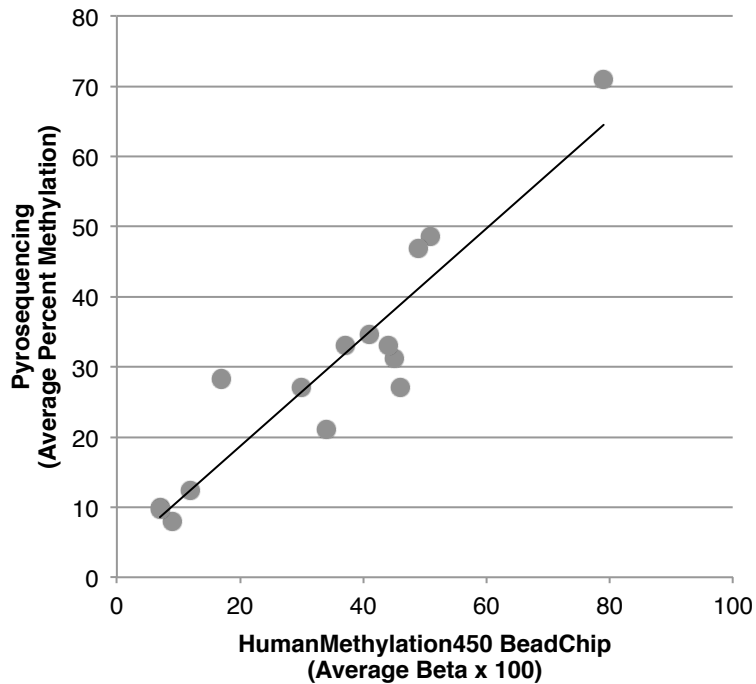

**Supplementary Figure 1. Comparison of HM450 BeadChip and Pyrosequencing data shows correlation between analysis methods.**

CpG site methylation data from Table 4 were plotted to determine the correlation coefficient of the HM450 BeadChip (x-axis) and pyrosequencing (y-axis) data. All four ZNF350 and the single MAGED1 CpG sites are included on the graph. A single replicate was used for HM450 BeadChip data and the average of three replicates was used for pyrosequencing data. HM450 BeadChip beta value times 100 was calculated to compare with pyrosequencing percent. Pearson  $r = 0.931$ ,  $p\text{-value} = <0.0001$ .

**Supplementary Table 1. Hyper- and Hypomethylated Pathways shared by TMX2-11 and TMX2-28 Hypermethylated\***

| <i>Pathway</i>                                   | <i>Genes</i>                                                                                                                                                                                                                                                                                                                                                                                                                                                                                                                                                                                                                                                                                                                                                                                                                                                                                                                                                                                                                                                                                                                                                                                                                                                                                                 | <i>p value</i> |
|--------------------------------------------------|--------------------------------------------------------------------------------------------------------------------------------------------------------------------------------------------------------------------------------------------------------------------------------------------------------------------------------------------------------------------------------------------------------------------------------------------------------------------------------------------------------------------------------------------------------------------------------------------------------------------------------------------------------------------------------------------------------------------------------------------------------------------------------------------------------------------------------------------------------------------------------------------------------------------------------------------------------------------------------------------------------------------------------------------------------------------------------------------------------------------------------------------------------------------------------------------------------------------------------------------------------------------------------------------------------------|----------------|
| sensory perception of smell                      | OR5L1, OR2J2, OR1J4, OR4D10, OR52D1, OR8K1, OR4S2, OR52L1, OR8K3, OR5R1, OR5M1, OR5M3, OR4M1, OR5M9, OR10AG1, OR4D6, OR1S2, OR5M8, CNGA2, OR1S1, OR5H14, OR8J1, OR52K1, OR5H15, OR8J3, OR13F1, OR2D3, OR2L8, OR2B3, OR8U8, OR2L13, OR1G1, OR6A2, OR2T33, OR5AS1, OR10C1, OR10W1, OR5P3, OR2AG1, OR7G1, OR5P2, OR5M10, OR52E4, OR6C75, OR5AC2, OR2M4, OR2M5, OR12D2, OR52M1, OR12D3, OR4A15, OR11H6, OR4A16, OR10A6, OR52A1, OR5H2, OR4K17, OR11A1, OR51Q1, OR9A4, OR5W2, OR13A1, OR14J1, OR5AN1, OR5I1, OR52B2, OR52B4, OR2W1, OR2H1, GRM8, OR5V1, GRM7, OR6Q1, OR5D14, OR5D16, OR8H3, OR5D18, OR1L3, OR5A1, OR5A2, OR9Q1, OR9Q2, OR13C3, OR9I1, OR10G9, OR5E1P, OR5B12, OR5AP2, OR13C8, OR5B17, OR9G9, OR1B1, OR5K4, OR9G1, OR9G4, OR5B2, OR5T2, OR5B3, OR5T1, OR4X1, OR13D1, OR10Q1, OR8H2                                                                                                                                                                                                                                                                                                                                                                                                                                                                                                                 | 2.13E-34       |
| cell surface receptor linked signal transduction | ADCY5, GPR123, LPHN2, HTR1B, S1PR1, GRIN2B, OR52L1, OR4S2, GAB1, ROS1, ADAM9, OR5R1, ATRNL1, OR1S2, OR4D6, OR1S1, VEGFC, GRB10, PPBP, OR52K1, F2, HTR6, OR13F1, ROR1, ROR2, ADAMTS1, OR2D3, OR2B3, GNAI1, OR8U8, AKAP12, EPHB1, GPR141, SORCS3, OR1G1, ITGBL1, HCRTR1, OR6A2, BAI3, FCER1A, GUCY2F, BMP2, OR5P3, OR2AG1, TCF7, OR7G1, OR5P2, SMAD5, MAML2, TAX1BP3, KCNK2, BTLA, OR12D2, OR52M1, OR12D3, SFRP2, NOTCH4, PTENP1, FGF5, OR10A6, OR52A1, FGF9, OR11A1, OR51Q1, SIRPB1, EDNRB, OR9A4, OR5W2, OR13A1, NMUR2, SPG21, OR5AN1, OR52B2, OR52B4, OR2W1, GRM3, CCND1, GRM2, DACT1, CHRDL1, GRM8, OR2H1, GRM7, OR5V1, WNT9B, NPPB, IL12B, RAPGEFL1, CXCL5, APC2, OR5D14, GPR63, OR5D16, CXCL2, FPR1, OR5D18, FPR2, OR5A1, OR5A2, OR9Q1, OR9Q2, OR13C3, DGKB, PTK2B, OR5E1P, OR5AP2, OR5B12, NPFFR2, OR13C8, OR5B17, OR1B1, DGKK, DGKI, GRIA4, PTGFR, OR5T2, OR5B2, OR5B3, OR5T1, OR13D1, MC4R, OR10Q1, IFT52, BAMBI, WNT7A, HTR2A, BMP10, OR5L1, OR2J2, OR1J4, OR4D10, OR52D1, MARCO, OR8K1, WNT2, TIAM1, OR8K3, INSR, IRS2, OR5M1, BAIAP2, OR5M3, FGF22, DLL1, SOCS5, OR4M1, OR5M9, FGF20, OR10AG1, OR5M8, NCAM1, GABRR3, OR5H14, OR8J1, OR8J3, OR5H15, GPR50, AKAP4, C3AR1, OR2L8, PKHD1, OR2L13, ITGB6, OR2T33, OR5AS1, OR10C1, ENTPD1, DEFB1, OR10W1, GABRE, OR5M10, GABRA4, GABRA3, GABRA6, OR52E4, | 4.28E-33       |

OR6C75, OR2M4, OR5AC2, OR2M5, OR4A15, OR11H6, OR4A16, CD274, ADRA1B, ADRA1A, MERTK, OR5H2, LEPR, PREX2, OR4K17, TAAR8, TAAR9, IAPP, RSPO3, HEY2, RSPO2, OR14J1, NRG1, GABRG1, OR5I1, GABRG3, CCDC88C, ARID5B, FSHR, ADRB2, CHRM2, OR6Q1, GAP43, GPRC5C, OR8H3, APH1B, GPR6, TAC1, OXTR, OR1L3, PF4, GPRC5B, MSX2, APLNR, HRH1, OR10G9, OR9I1, PTN, APC, OR9G9, PTPRD, FLT1, GNAO1, OR5K4, OR9G1, OR9G4, RGS13, OR4X1, OR8H2, BMPR1B, ADAMDEC1

neurological system process

RP1, SYT5, OR5L1, OR2J2, OR1J4, OR4D10, OR52D1, WNT2, OR8K1, CTTNBP2, HTR1B, BDNF, S1PR1, OR4S2, GRIN2B, OR52L1, OR8K3, CHRNA7, OR5R1, KCND2, OR5M1, TRPA1, SIX3, OR5M3, OR4M1, OR5M9, OR10AG1, OR4D6, OR1S2, OR1S1, CNGA2, CTNNA2, OR5M8, GABRR3, LRAT, CAMK4, OR5H14, OR52K1, OR8J1, OR8J3, OR5H15, HTR6, OR13F1, OR2D3, OR2L8, OR2B3, OR8U8, ASZ1, RIMS1, OR2L13, OR1G1, KCNMB2, HCRT1, CRB1, OR6A2, OR5AS1, OR2T33, OR10C1, OR10W1, GUCY2F, OR2AG1, OR5P3, OR5P2, OR7G1, OR5M10, GABRA3, GABRA6, OR52E4, OR6C75, NR4A3, OR2M4, OR5AC2, OR2M5, FOXP2, OR12D2, OR12D3, OR52M1, OR4A15, OR11H6, OR4A16, ADRA1B, CHRND, CACNA1E, RIT2, MERTK, CACNA1C, PTENP1, OR10A6, OR52A1, OR5H2, OR4K17, OR11A1, OR51Q1, MBP, SLC1A4, KCNQ5, OR9A4, WDR36, OR5W2, IAPP, SLC24A2, OR13A1, NMUR2, CNTNAP2, OR14J1, IMPDH1, KCNQ1, USH2A, OR5AN1, GABRG1, OR52B2, OR5I1, GABRG3, OR52B4, RAX, NRXN3, NRXN1, OR2W1, GRM3, EYA1, GRM2, GRM8, OR2H1, SBF2, GRM7, OR5V1, PLLP, IL12B, OR6Q1, OAT, ABLIM1, OR5D14, OR8H3, OR5D16, TAC1, OR5D18, OXTR, OR1L3, COL2A1, OR5A1, OR5A2, OR9Q1, ESPN, OR9Q2, OR13C3, HRH1, OR10G9, OR9I1, OR5E1P, OR5AP2, OR5B12, PTN, SCNN1A, NEFL, OR13C8, SCNN1D, OR5B17, OR1B1, OR9G9, OR5K4, DLGAP2, OR9G1, TBX1, AFF2, OR9G4, GRIA4, OR5T2, OR5B2, OR5B3, OR5T1, OR4X1, GRIA2, GRIA1, OR13D1, OR10Q1, OR8H2, PBX3, APBB1, WNT7A, HTR2A

1.34E-32

sensory perception of  
chemical stimulus

OR5L1, OR2J2, OR1J4, OR4D10, OR52D1, OR8K1, OR4S2, OR52L1, OR8K3, OR5R1, OR5M1, TRPA1, OR5M3, OR4M1, OR5M9, OR10AG1, OR4D6, OR1S2, OR5M8, CNGA2, OR1S1, OR5H14, OR8J1, OR52K1, OR5H15, OR8J3, OR13F1, OR2D3, OR2L8, OR2B3, OR8U8, OR2L13, OR1G1, OR6A2, OR2T33, OR5AS1, OR10C1, OR10W1, OR5P3, OR2AG1, OR7G1, OR5P2, OR5M10, OR52E4, OR6C75, OR5AC2, OR2M4, OR2M5, OR12D2, OR52M1, OR12D3, OR4A15, OR11H6, OR4A16, OR10A6, OR52A1,

1.72E-32

OR5H2, OR4K17, OR11A1, OR51Q1, OR9A4, OR5W2, OR13A1, OR14J1, OR5AN1, OR5I1, OR52B2, OR52B4, OR2W1, OR2H1, GRM8, OR5V1, GRM7, OR6Q1, OR5D14, OR5D16, OR8H3, OR5D18, OR1L3, OR5A1, OR5A2, OR9Q1, OR9Q2, OR13C3, OR9I1, OR10G9, OR5E1P, OR5AP2, OR5B12, OR13C8, SCNN1A, SCNN1D, OR5B17, OR9G9, OR1B1, OR5K4, OR9G1, OR9G4, OR5B2, OR5T2, OR5B3, OR5T1, OR4X1, OR13D1, OR10Q1, OR8H2

G-protein coupled receptor protein signaling pathway

ADCY5, GPR123, OR5L1, OR2J2, OR1J4, OR4D10, OR52D1, OR8K1, LPHN2, HTR1B, S1PR1, OR4S2, OR52L1, OR8K3, INSR, OR5R1, ATRNL1, OR5M1, OR5M3, OR4M1, OR5M9, OR10AG1, OR4D6, OR1S2, OR1S1, OR5M8, GABRR3, PPBP, OR5H14, OR52K1, OR8J1, OR8J3, OR5H15, HTR6, OR13F1, GPR50, OR2D3, OR2L8, C3AR1, OR2B3, GNAI1, OR8U8, PKHD1, AKAP12, OR2L13, GPR141, OR1G1, SORCS3, HCRTR1, OR6A2, OR5AS1, OR2T33, BAI3, OR10C1, ENTPD1, DEFB1, OR10W1, GABRE, OR2AG1, OR5P3, OR5P2, OR7G1, GABRA4, OR5M10, GABRA3, GABRA6, OR52E4, OR6C75, KCNK2, OR2M4, OR5AC2, OR2M5, OR12D2, OR12D3, OR52M1, OR11H6, OR4A15, OR4A16, ADRA1B, ADRA1A, OR10A6, OR52A1, OR5H2, PREX2, OR4K17, OR11A1, OR51Q1, TAAR8, TAAR9, EDNRB, OR9A4, OR5W2, IAPP, OR13A1, NMUR2, OR14J1, OR5AN1, GABRG1, OR52B2, OR5I1, GABRG3, OR52B4, FSHR, OR2W1, GRM3, ADRB2, GRM2, GRM8, CHRM2, OR2H1, GRM7, OR5V1, OR6Q1, RAPGEFL1, GAP43, GPRC5C, CXCL5, OR5D14, GPR63, OR8H3, OR5D16, CXCL2, FPR1, GPR6, TAC1, OR5D18, OXTR, PF4, OR1L3, FPR2, GPRC5B, OR5A1, OR5A2, OR9Q1, OR9Q2, APLNR, OR13C3, HRH1, DGKB, OR10G9, OR9I1, OR5E1P, OR5AP2, NPFFR2, OR5B12, OR13C8, OR5B17, OR1B1, OR9G9, GNAO1, OR5K4, DGKK, OR9G1, OR9G4, DGKI, PTGFR, OR5T2, OR5B2, RGS13, OR5B3, OR5T1, OR4X1, OR13D1, MC4R, OR10Q1, OR8H2, HTR2A

5.72E-30

cognition

RP1, OR5L1, OR2J2, OR1J4, OR4D10, OR52D1, OR8K1, BDNF, OR4S2, GRIN2B, OR52L1, OR8K3, CHRNA7, OR5R1, OR5M1, TRPA1, SIX3, OR5M3, OR4M1, OR5M9, OR10AG1, OR4D6, OR1S2, OR1S1, CNGA2, OR5M8, LRAT, OR5H14, OR52K1, OR8J1, OR8J3, OR5H15, OR13F1, OR2D3, OR2L8, OR2B3, OR8U8, RIMS1, OR2L13, OR1G1, CRB1, OR6A2, OR2T33, OR5AS1, OR10C1, OR10W1, GUCY2F, OR5P3, OR2AG1, OR5P2, OR7G1, OR5M10, OR52E4, OR6C75, OR5AC2, OR2M4, OR2M5, FOXP2, OR12D2, OR52M1, OR12D3, OR11H6, OR4A15, OR4A16, ADRA1B, MERTK,

2.95E-27

CACNA1C, PTENP1, OR10A6, OR52A1, OR5H2, OR4K17, OR11A1, OR51Q1, SLC1A4, OR9A4, WDR36, OR5W2, IAPP, SLC24A2, OR13A1, OR14J1, IMPDH1, KCNQ1, USH2A, OR5AN1, OR52B2, OR5I1, OR52B4, RAX, OR2W1, EYA1, GRM8, OR2H1, OR5V1, GRM7, IL12B, OR6Q1, OAT, ABLIM1, OR5D14, OR8H3, OR5D16, OXTR, TAC1, OR5D18, OR1L3, COL2A1, OR5A1, OR5A2, OR9Q1, ESPN, OR9Q2, OR13C3, OR10G9, OR9I1, OR5E1P, OR5AP2, OR5B12, PTN, OR13C8, SCNN1A, SCNN1D, OR5B17, OR1B1, OR9G9, OR5K4, OR9G1, AFF2, TBX1, OR9G4, OR5T2, OR5B2, OR5B3, OR5T1, OR4X1, GRIA1, OR13D1, OR10Q1, OR8H2, APBB1, HTR2A

sensory perception

RP1, OR5L1, OR2J2, OR1J4, OR4D10, OR52D1, OR8K1, OR4S2, GRIN2B, OR52L1, OR8K3, OR5R1, OR5M1, TRPA1, SIX3, OR5M3, OR4M1, OR5M9, OR10AG1, OR4D6, OR1S2, OR1S1, CNGA2, OR5M8, LRAT, OR5H14, OR52K1, OR8J1, OR8J3, OR5H15, OR13F1, OR2D3, OR2L8, OR2B3, OR8U8, RIMS1, OR2L13, OR1G1, CRB1, OR6A2, OR2T33, OR5AS1, OR10C1, OR10W1, GUCY2F, OR5P3, OR2AG1, OR5P2, OR7G1, OR5M10, OR52E4, OR6C75, OR5AC2, OR2M4, OR2M5, OR12D2, OR52M1, OR12D3, OR11H6, OR4A15, OR4A16, MERTK, OR10A6, OR52A1, OR5H2, OR4K17, OR11A1, OR51Q1, OR9A4, WDR36, OR5W2, IAPP, SLC24A2, OR13A1, OR14J1, IMPDH1, KCNQ1, USH2A, OR5AN1, OR52B2, OR5I1, OR52B4, RAX, OR2W1, EYA1, GRM8, OR2H1, OR5V1, GRM7, IL12B, OR6Q1, OAT, ABLIM1, OR5D14, OR8H3, OR5D16, OR5D18, TAC1, COL2A1, OR1L3, OR5A1, OR5A2, OR9Q1, ESPN, OR9Q2, OR13C3, OR9I1, OR10G9, OR5E1P, OR5AP2, OR5B12, OR13C8, SCNN1A, SCNN1D, OR5B17, OR9G9, OR1B1, OR5K4, OR9G1, TBX1, OR9G4, OR5T2, OR5B2, OR5B3, OR5T1, OR4X1, OR13D1, OR10Q1, OR8H2, HTR2A

6.98E-26

ion transport

SLC9A9, SLC9A6, SCN3A, GABRB1, SLC26A2, KCNIP4, WNT2, MARCO, KCNQ5, CTTNBP2, ATP2B4, GRIN2B, SLC24A3, SLC24A2, NMUR2, SLC01C1, ANO2, ANO5, CHRNA7, ANO4, MCOLN2, KCNQ1, OCA2, GABRG1, GABRG3, SVOP, KCND2, ATP4B, TRPA1, CACNG3, CNGA2, GABRR3, ATP2C2, ATP2C1, RYR3, F2, CLIC6, RYR2, KCNH8, SCN11A, PLLP, KCNH5, SLC38A4, SLC39A12, KCNA4, ASZ1, KCNMB2, KCNS3, KCNS2, SLC01A2, CYP27B1, SCN9A, SCNN1A, SCNN1D, GABRQ, GABRE, TRPC4, SLC8A1, SLC12A1, GABRA4, GABRA3, KCNB2, GABRA6, ATP11B, GRIA4, CACNA2D3, KCNK2, KCNJ4, SLC01B3, SLC17A3, GRIA2, KCNJ9, SLC17A4, GRIA1, SLC5A8, CACNA1H, SCN4B, CHRND, HEPH, CACNA1E, KCTD16, CACNA1C,

5.82E-08

## CLCN7

|                               |                                                                                                                                                                                                                                                                                                                                                                                                                                                                                |          |
|-------------------------------|--------------------------------------------------------------------------------------------------------------------------------------------------------------------------------------------------------------------------------------------------------------------------------------------------------------------------------------------------------------------------------------------------------------------------------------------------------------------------------|----------|
| cell-cell signaling           | FGF5, SYT5, FGF9, FGF14, ILDR2, GDNF, MBP, WNT2, SLC1A4, KCNQ5, CTTNBP2, HTR1B, BDNF, GRIN2B, IAPP, NMUR2, LTBR, GABRG1, GABRG3, KCND2, NRXN3, SIX3, NRXN1, FGF20, CTNNA2, GABRR3, GRM3, GRB10, GRM2, CAMK4, GRM8, GRM7, HTR6, WNT9B, GPR50, CXCL5, ASZ1, TAC1, OXTR, RIMS1, EPHB1, HCRTR1, IL17A, HRH1, CRB1, IFNA7, FCER1A, BMP2, TRHDE, GABRA3, DLGAP2, GABRA6, GRIA4, TNFSF9, GRIA2, GRIA1, SALL1, MC4R, ADRA1B, ADRA1A, CACNA1E, RIT2, LRP2, MERTK, CACNA1C, WNT7A, HTR2A | 4.29E-07 |
| transmission of nerve impulse | SYT5, ASZ1, TAC1, OXTR, RIMS1, KCNMB2, MBP, WNT2, SLC1A4, CTTNBP2, KCNQ5, HCRTR1, HRH1, HTR1B, S1PR1, GRIN2B, NMUR2, CNTNAP2, GABRG1, GABRG3, KCND2, DLGAP2, NRXN3, GABRA3, GABRA6, GRIA4, NRXN1, CTNNA2, GABRR3, GRM3, GRM2, CAMK4, GRIA2, GRIA1, SBF2, GRM8, GRM7, HTR6, PLLP, CACNA1E, RIT2, CACNA1C, WNT7A, HTR2A                                                                                                                                                          | 2.94E-06 |
| synaptic transmission         | SYT5, ASZ1, TAC1, OXTR, RIMS1, MBP, WNT2, SLC1A4, CTTNBP2, KCNQ5, HCRTR1, HTR1B, HRH1, GRIN2B, GABRG1, GABRG3, KCND2, NRXN3, GABRA3, DLGAP2, GABRA6, GRIA4, NRXN1, CTNNA2, GABRR3, GRM3, GRM2, CAMK4, GRIA2, GRM8, GRIA1, GRM7, HTR6, CACNA1E, RIT2, CACNA1C, WNT7A, HTR2A                                                                                                                                                                                                     | 1.13E-05 |
| neuron differentiation        | TUBB2B, HELT, RORA, PRKG1, GDNF, RTN1, EFHD1, BDNF, S1PR1, CNTNAP2, ROBO2, UNC5C, ROBO3, NRXN3, STMN2, BAIAP2, NRXN1, FGF20, CTNNA2, FARP2, SLITRK2, BTG4, RELN, CNTN4, GAP43, DCC, PKHD1, SOX5, BRSK1, EPHB1, ALDH1A2, CRB1, PTK2B, TNFR, GF11, OLFM3, DCX, NEFL, APC, GNAO1, BHLHE22, PTPRZ1, NTNG1, LMX1A, PBX3, BMPR1B, APBB1, WNT7A, PTENP1                                                                                                                               | 1.83E-05 |
| metal ion transport           | SLC9A9, SLC9A6, SCN3A, KCNIP4, KCNQ5, ATP2B4, GRIN2B, SLC24A3, NMUR2, SLC24A2, CHRNA7, KCNQ1, KCND2, ATP4B, TRPA1, CACNG3, ATP2C2, ATP2C1, RYR3, F2, RYR2, SCN11A, KCNH8, KCNH5, SLC38A4, SLC39A12, KCNA4, KCNMB2, KCNS3, CYP27B1, KCNS2, SCN9A, SCNN1A, SCNN1D, SLC8A1, TRPC4, SLC12A1, KCNB2, CACNA2D3, KCNK2, KCNJ4, KCNJ9, SLC17A3, SLC17A4, SLC5A8, CACNA1H, SCN4B, CACNA1E, HEPH, KCTD16, CACNA1C                                                                        | 2.07E-05 |

|                              |                                                                                                                                                                                                                                                                                                                                                                                                                                                                      |          |
|------------------------------|----------------------------------------------------------------------------------------------------------------------------------------------------------------------------------------------------------------------------------------------------------------------------------------------------------------------------------------------------------------------------------------------------------------------------------------------------------------------|----------|
| behavior                     | HELT, LEPR, GDNF, BSX, EDNRB, HTR1B, BDNF, GRIN2B, NMUR2, SLC24A2, ROBO2, CHRNA7, ROBO3, GRM2, PPBP, GRM7, RELN, RASD2, CCL1, C3AR1, CXCL5, CXCL2, FPR1, ASTN1, TAC1, OXTR, PF4, FPR2, ESPN, PLCL1, HCRTR1, SCN9A, PTN, GF11, DEFB1, GNAO1, TBX1, AFF2, NR4A3, FOXP2, CXCL17, GRIA1, NLGN4X, ADRA1B, MC4R, CACNA1C, PBX3, APBB1, PTENP1, HTR2A                                                                                                                       | 5.32E-05 |
| cell motion                  | NEURL, ZEB2, PRKG1, GDNF, DSTN, WNT2, CTTNBP2, EDNRB, BDNF, DAB1, VNN1, ROBO2, ROBO3, UNC5C, NR2F2, NRXN3, ARID5B, NRXN1, CTNNA2, ELMO1, VEGFC, RELN, CNTN4, IL12B, GAP43, AKAP4, DCC, VIM, FPR1, ASTN1, ASZ1, PF4, CDH2, FPR2, EPHB1, PTK2B, TNR, CLASP2, DCX, APC, FN1, FLT1, TBX1, LMX1A, ETS1, BMPR1B, APBB1, SELE, PTENP1                                                                                                                                       | 1.41E-04 |
| regulation of system process | KCNE1L, BMP10, LZTS1, TAC1, OXTR, CDH2, GDNF, KCNMB2, EDNRB, HTR1B, BDNF, GRIN2B, SLC24A2, NMUR2, LTB, KCNQ1, SLC8A1, GNAO1, FLT1, KCNB2, GRIA4, LAMA2, GRM3, ADRB2, GRIA2, CHRM2, GRM8, ADRA1B, CACNA1H, NPPB, RYR2, CNTN4, PBX3, CACNA1C, HTR2A                                                                                                                                                                                                                    | 2.78E-04 |
| cell adhesion                | DLC1, COL21A1, MYBPC2, NELL1, SDC3, REG3A, ARHGAP6, DAB1, S1PR1, DGCR6, CNTNAP2, VNN1, ROBO2, ADAM9, CNTNAP5, NRXN3, SIGLEC12, NRXN1, BTBD9, CTNNA2, NCAM1, CD84, ARVCF, ATP2C1, LSAMP, ROR2, RELN, SGCE, CNTN4, CHL1, PARVA, DCHS2, CLDN17, PLXNC1, PKHD1, TNC, ASTN1, COL2A1, FPR2, CDH2, APLP1, ITGBL1, IGSF11, LAMB4, CDH7, COL6A6, FAT3, PTK2B, FAT4, TNR, HEPN1, ITGB6, DEFB118, COL8A1, ENTPD1, FN1, APC, TNXB, LAMA2, COL19A1, NLGN4X, COL29A1, BMPR1B, SELE | 3.77E-04 |
| biological adhesion          | DLC1, COL21A1, MYBPC2, NELL1, SDC3, REG3A, ARHGAP6, DAB1, S1PR1, DGCR6, CNTNAP2, VNN1, ROBO2, ADAM9, CNTNAP5, NRXN3, SIGLEC12, NRXN1, BTBD9, CTNNA2, NCAM1, CD84, ARVCF, ATP2C1, LSAMP, ROR2, RELN, SGCE, CNTN4, CHL1, PARVA, DCHS2, CLDN17, PLXNC1, PKHD1, TNC, ASTN1, COL2A1, FPR2, CDH2, APLP1, ITGBL1, IGSF11, LAMB4, CDH7, COL6A6, FAT3, PTK2B, FAT4, TNR, HEPN1, ITGB6, DEFB118, COL8A1, ENTPD1, FN1, APC, TNXB, LAMA2, COL19A1, NLGN4X, COL29A1, BMPR1B, SELE | 3.91E-04 |



|                               |                                                                                                                                                                                                              |          |
|-------------------------------|--------------------------------------------------------------------------------------------------------------------------------------------------------------------------------------------------------------|----------|
| neuron projection development | DCC, PKHD1, PRKG1, GDNF, EPHB1, EFHD1, BDNF, PTK2B, TNFR, ROBO2, UNC5C, ROBO3, DCX, NEFL, APC, GNAO1, NRXN3, PTPRZ1, BAIAP2, NTNG1, NRXN1, LMX1A, CTNNA2, SLITRK2, RELN, CNTN4, BMPR1B, APBB1, GAP43, PTENP1 | 4.75E-04 |
| calcium ion transport         | TRPC4, SLC8A1, TRPA1, CACNG3, CACNA2D3, ATP2C2, ATP2B4, CYP27B1, GRIN2B, SLC24A3, ATP2C1, RYR3, SLC24A2, NMUR2, F2, CACNA1H, RYR2, CHRNA7, CACNA1E, CACNA1C                                                  | 5.98E-04 |

### Hypomethylated\*\*

| <i>Pathway</i>                                 | <i>Genes</i>                                       | <i>p value</i> |
|------------------------------------------------|----------------------------------------------------|----------------|
| fear response                                  | BDNF, CCK, GRIK2                                   | 0.007256045    |
| cell morphogenesis involved in differentiation | SEMA5A, BDNF, CCK, KAL1, C22ORF28, DCLK1           | 0.025362986    |
| neuron development                             | SEMA5A, BDNF, CCK, KAL1, RORB, DCLK1, NTM          | 0.027953923    |
| multicellular organismal response to stress    | BDNF, CCK, GRIK2                                   | 0.028802466    |
| neuron differentiation                         | SEMA5A, BDNF, CCK, KAL1, RORB, SMARCA1, DCLK1, NTM | 0.029533905    |

\*Top 20 hypermethylated pathways \*\*Top 5 hypomethylated pathways

**Supplementary Table 2. Hypermethylated Pathways shared by TMX2-11 and TMX2-28 in the promoter**

| <i>Pathway</i>                                       | <i>Genes</i>                                                                                                                                                                                                                                                                                                                                                                                                                                                                                                                                                                                                                                                                                                                                                   | <i>p value</i> |
|------------------------------------------------------|----------------------------------------------------------------------------------------------------------------------------------------------------------------------------------------------------------------------------------------------------------------------------------------------------------------------------------------------------------------------------------------------------------------------------------------------------------------------------------------------------------------------------------------------------------------------------------------------------------------------------------------------------------------------------------------------------------------------------------------------------------------|----------------|
| sensory perception of smell                          | OR10A6, OR5H2, OR5L1, OR11A1, OR2J2, OR1J4, OR51Q1, OR4D10, OR52D1, OR8K1, OR9A4, OR4S2, OR5W2, OR13A1, OR8K3, OR5AN1, OR52B2, OR5I1, OR52B4, OR5M1, OR4M1, OR4D6, OR1S2, OR1S1, OR5M8, CNGA2, OR5H14, OR52K1, GRM8, OR5V1, OR5H15, OR2D3, OR2L8, OR2B3, OR8U8, OR8H3, OR1L3, OR5A2, OR2L13, OR9Q1, OR1G1, OR9Q2, OR13C3, OR9I1, OR10G9, OR5E1P, OR5AP2, OR2T33, OR5B12, OR5AS1, OR10C1, OR10W1, OR5B17, OR9G9, OR5P3, OR2AG1, OR7G1, OR5P2, OR5K4, OR9G1, OR6C75, OR2M4, OR5B3, OR2M5, OR4X1, OR52M1, OR11H6, OR13D1, OR4A16, OR8H2                                                                                                                                                                                                                           | 6.50E-32       |
| sensory perception of chemical stimulus              | OR10A6, OR5H2, OR5L1, OR11A1, OR2J2, OR51Q1, OR1J4, OR4D10, OR52D1, OR8K1, OR9A4, OR4S2, OR5W2, OR13A1, OR8K3, OR5AN1, OR52B2, OR5I1, OR52B4, OR5M1, OR4M1, OR4D6, OR1S2, OR1S1, OR5M8, CNGA2, OR5H14, OR52K1, GRM8, OR5V1, OR5H15, OR2D3, OR2L8, OR2B3, OR8U8, OR8H3, OR1L3, OR5A2, OR2L13, OR9Q1, OR1G1, OR9Q2, OR13C3, OR9I1, OR10G9, OR5E1P, OR5AP2, OR2T33, OR5B12, OR5AS1, OR10C1, SCNN1A, SCNN1D, OR10W1, OR5B17, OR9G9, OR5P3, OR2AG1, OR7G1, OR5P2, OR5K4, OR9G1, OR6C75, OR2M4, OR5B3, OR2M5, OR4X1, OR52M1, OR11H6, OR13D1, OR4A16, OR8H2                                                                                                                                                                                                           | 8.96E-31       |
| G-protein coupled receptor protein signaling pathway | OR5L1, OR2J2, OR1J4, OR4D10, OR52D1, OR8K1, HTR1B, S1PR1, OR4S2, OR8K3, OR5M1, ATRNL1, OR4M1, OR4D6, OR1S2, OR5M8, OR1S1, GABRR3, PPBP, OR5H14, OR52K1, HTR6, OR5H15, OR2D3, C3AR1, OR2L8, OR2B3, OR8U8, AKAP12, GPR141, OR2L13, OR1G1, OR2T33, OR5AS1, OR10C1, DEFB1, OR10W1, GABRE, OR5P3, OR2AG1, OR7G1, OR5P2, GABRA3, GABRA6, OR6C75, OR2M4, OR2M5, OR52M1, OR11H6, OR4A16, OR10A6, OR5H2, OR11A1, OR51Q1, EDNRB, TAAR9, OR9A4, OR5W2, OR13A1, OR5AN1, GABRG1, OR5I1, OR52B2, OR52B4, FSHR, GRM3, CHRM2, GRM8, OR5V1, GAP43, CXCL5, GPR63, CXCL2, OR8H3, GPR6, FPR1, TAC1, OR1L3, PF4, FPR2, OR5A2, OR9Q1, OR9Q2, HRH1, OR13C3, DGKB, OR9I1, OR10G9, OR5E1P, OR5B12, OR5AP2, OR5B17, OR9G9, GNAO1, OR5K4, OR9G1, DGKK, OR5B3, RGS13, OR4X1, OR13D1, OR8H2 | 5.19E-26       |

|                                     |                                                                                                                                                                                                                                                                                                                                                                                                                                                                                                                                                                                                                                                                                                                                                              |          |
|-------------------------------------|--------------------------------------------------------------------------------------------------------------------------------------------------------------------------------------------------------------------------------------------------------------------------------------------------------------------------------------------------------------------------------------------------------------------------------------------------------------------------------------------------------------------------------------------------------------------------------------------------------------------------------------------------------------------------------------------------------------------------------------------------------------|----------|
| neurological system process         | OR5L1, OR2J2, OR1J4, OR4D10, OR52D1, OR8K1, CTTNBP2, BDNF, HTR1B, S1PR1, OR4S2, OR8K3, OR5M1, SIX3, OR4M1, OR4D6, OR1S2, OR5M8, CNGA2, OR1S1, GABRR3, OR5H14, OR52K1, HTR6, OR5H15, OR2D3, OR2L8, OR2B3, OR8U8, ASZ1, RIMS1, OR2L13, KCNMB2, OR1G1, CRB1, OR2T33, OR5AS1, OR10C1, OR10W1, OR5P3, OR2AG1, OR7G1, OR5P2, GABRA3, GABRA6, OR6C75, OR2M4, OR2M5, OR52M1, OR11H6, OR4A16, CHRND, PTENP1, OR10A6, OR5H2, OR11A1, OR51Q1, SLC1A4, OR9A4, WDR36, OR5W2, OR13A1, CNTNAP2, KCNQ1, OR5AN1, GABRG1, OR5I1, OR52B2, OR52B4, NRXN1, GRM3, GRM8, OR5V1, OR8H3, TAC1, OR1L3, OR5A2, OR9Q1, OR9Q2, HRH1, OR13C3, OR9I1, OR10G9, OR5E1P, OR5B12, OR5AP2, SCNN1A, SCNN1D, OR5B17, OR9G9, OR5K4, DLGAP2, OR9G1, GRIA4, OR5B3, OR4X1, GRIA1, OR13D1, OR8H2, APBB1 | 2.31E-22 |
| sensory perception                  | OR10A6, OR5H2, OR5L1, OR2J2, OR11A1, OR51Q1, OR1J4, OR4D10, OR52D1, OR8K1, OR9A4, WDR36, OR4S2, OR5W2, OR13A1, OR8K3, KCNQ1, OR5AN1, OR52B2, OR5I1, OR52B4, OR5M1, SIX3, OR4M1, OR4D6, OR1S2, OR1S1, OR5M8, CNGA2, OR5H14, OR52K1, GRM8, OR5V1, OR5H15, OR2D3, OR2L8, OR2B3, OR8U8, OR8H3, TAC1, OR1L3, RIMS1, OR5A2, OR2L13, OR9Q1, OR1G1, OR9Q2, OR13C3, CRB1, OR9I1, OR10G9, OR5E1P, OR5AP2, OR2T33, OR5B12, OR5AS1, OR10C1, SCNN1A, SCNN1D, OR10W1, OR5B17, OR9G9, OR5P3, OR2AG1, OR7G1, OR5P2, OR5K4, OR9G1, OR6C75, OR2M4, OR5B3, OR2M5, OR4X1, OR52M1, OR11H6, OR13D1, OR4A16, OR8H2                                                                                                                                                                  | 6.40E-21 |
| cognition                           | OR10A6, OR5H2, OR5L1, OR2J2, OR11A1, OR51Q1, OR1J4, OR4D10, OR52D1, OR8K1, SLC1A4, BDNF, OR9A4, WDR36, OR4S2, OR5W2, OR13A1, OR8K3, KCNQ1, OR5AN1, OR52B2, OR5I1, OR52B4, OR5M1, SIX3, OR4M1, OR4D6, OR1S2, OR1S1, OR5M8, CNGA2, OR5H14, GRM8, OR52K1, OR5V1, OR5H15, OR2D3, OR2L8, OR2B3, OR8U8, OR8H3, TAC1, OR1L3, OR5A2, RIMS1, OR2L13, OR9Q1, OR1G1, OR9Q2, OR13C3, CRB1, OR9I1, OR10G9, OR5E1P, OR5AP2, OR2T33, OR5B12, OR5AS1, OR10C1, SCNN1A, SCNN1D, OR10W1, OR5B17, OR9G9, OR5P3, OR2AG1, OR7G1, OR5P2, OR5K4, OR9G1, OR6C75, OR2M4, OR5B3, OR2M5, OR4X1, OR52M1, GRIA1, OR11H6, OR13D1, OR4A16, OR8H2, APBB1, PTENP1                                                                                                                              | 6.69E-21 |
| cell surface receptor linked signal | BMP10, OR5L1, OR2J2, OR1J4, OR4D10, OR52D1, OR8K1, MARCO, HTR1B, S1PR1, OR4S2, OR8K3, IRS2, OR5M1, ATRNL1, FGF22, SOCS5, OR4M1, OR4D6, OR1S2,                                                                                                                                                                                                                                                                                                                                                                                                                                                                                                                                                                                                                | 2.52E-20 |

|                                           |                                                                                                                                                                                                                                                                                                                                                                                                                                                                                                                                                                                                                                                                                                                                                                         |             |
|-------------------------------------------|-------------------------------------------------------------------------------------------------------------------------------------------------------------------------------------------------------------------------------------------------------------------------------------------------------------------------------------------------------------------------------------------------------------------------------------------------------------------------------------------------------------------------------------------------------------------------------------------------------------------------------------------------------------------------------------------------------------------------------------------------------------------------|-------------|
| transduction                              | OR1S1, OR5M8, GABRR3, VEGFC, GRB10, PPBP, OR5H14, OR52K1, HTR6, F2, OR5H15, ADAMTS1, OR2D3, C3AR1, OR2L8, OR2B3, OR8U8, AKAP12, GPR141, OR2L13, OR1G1, OR2T33, OR5AS1, OR10C1, DEFB1, OR10W1, GABRE, BMP2, OR5P3, OR2AG1, TCF7, OR7G1, OR5P2, GABRA3, GABRA6, SMAD5, OR6C75, TAX1BP3, OR2M4, OR2M5, OR52M1, SFRP2, OR11H6, OR4A16, PTENP1, OR10A6, OR5H2, OR11A1, OR51Q1, TAAR9, EDNRB, OR9A4, OR5W2, OR13A1, OR5AN1, GABRG1, OR52B2, OR5I1, OR52B4, FSHR, GRM3, DACT1, CHRDL1, GRM8, CHRM2, OR5V1, GAP43, CXCL5, APC2, GPR63, OR8H3, CXCL2, GPR6, FPR1, TAC1, PF4, OR1L3, FPR2, OR5A2, OR9Q1, OR9Q2, HRH1, OR13C3, DGKB, OR9I1, OR10G9, PTK2B, OR5E1P, OR5AP2, OR5B12, APC, OR5B17, OR9G9, GNAO1, OR5K4, OR9G1, DGKK, GRIA4, RGS13, OR5B3, OR4X1, OR13D1, OR8H2, IFT52 |             |
| defense response to bacterium             | DEFB121, PPBP, DEFB125, DEFB118, DEFB128, DEFB116, DEFB115, DEFB1, CTSG, DMBT1, DEFB119                                                                                                                                                                                                                                                                                                                                                                                                                                                                                                                                                                                                                                                                                 | 0.001357161 |
| gamma-aminobutyric acid signaling pathway | GABRG1, GABRE, GABRR3, GABRA3, GABRA6                                                                                                                                                                                                                                                                                                                                                                                                                                                                                                                                                                                                                                                                                                                                   | 0.002200012 |
| ion transport                             | SLC9A6, GABRB1, SLC39A12, ASZ1, SLC26A2, KCNIP4, KCNMB2, KCNS3, MARCO, CTTNBP2, SLC24A3, SCN9A, SLC01C1, ANO5, MCOLN2, ANO4, KCNQ1, SCNN1A, SCNN1D, GABRG1, GABRE, SLC8A1, SVOP, GABRA3, GABRA6, GRIA4, CNGA2, GABRR3, KCNJ4, ATP2C2, KCNJ9, GRIA1, F2, SLC5A8, SCN4B, CHRND, HEPH                                                                                                                                                                                                                                                                                                                                                                                                                                                                                      | 0.002297548 |
| transmission of nerve impulse             | GABRG1, DLGAP2, GABRA3, GABRA6, ASZ1, TAC1, NRXN1, GRIA4, RIMS1, KCNMB2, SLC1A4, CTTNBP2, GABRR3, GRM3, HRH1, HTR1B, S1PR1, GRM8, GRIA1, HTR6, CNTNAP2                                                                                                                                                                                                                                                                                                                                                                                                                                                                                                                                                                                                                  | 0.00257108  |
| regulation of cell migration              | BMP10, IRS2, ONECUT1, TAC1, LAMA2, VEGFC, S1PR1, SERPINE2, PTK2B, UNC5C, HDAC9, PTENP1, APC                                                                                                                                                                                                                                                                                                                                                                                                                                                                                                                                                                                                                                                                             | 0.003347862 |
| behavior                                  | CCL1, C3AR1, HELT, CXCL5, CXCL2, FPR1, TAC1, PF4, FPR2, EDNRB, PLCL1, BDNF, HTR1B, SCN9A, ROBO2, GFII1, DEFB1, GNAO1, CXCL17, PPBP, GRIA1, NLGN4X, APBB1, PTENP1, RASD2                                                                                                                                                                                                                                                                                                                                                                                                                                                                                                                                                                                                 | 0.004200034 |
| synaptic transmission                     | GABRG1, DLGAP2, GABRA3, GABRA6, ASZ1, TAC1, NRXN1, GRIA4, RIMS1, SLC1A4, CTTNBP2, GABRR3, HRH1, HTR1B, GRM3, GRM8, GRIA1, HTR6                                                                                                                                                                                                                                                                                                                                                                                                                                                                                                                                                                                                                                          | 0.005334357 |
| chemotaxis                                | CCL1, C3AR1, EDNRB, CXCL17, PPBP, CXCL5, CXCL2, FPR1, ROBO2, PF4, FPR2, DEFB1                                                                                                                                                                                                                                                                                                                                                                                                                                                                                                                                                                                                                                                                                           | 0.006194279 |

|                           |                                                                                                                                                                                                        |             |
|---------------------------|--------------------------------------------------------------------------------------------------------------------------------------------------------------------------------------------------------|-------------|
| taxis                     | CCL1, C3AR1, EDNRB, CXCL17, PPBP, CXCL5, CXCL2, FPR1, ROBO2, PF4, FPR2, DEFB1                                                                                                                          | 0.006194279 |
| cell-cell signaling       | CXCL5, ASZ1, TAC1, RIMS1, SLC1A4, CTTNBP2, HTR1B, HRH1, BDNF, IL17A, IFNA7, CRB1, GABRG1, BMP2, TRHDE, DLGAP2, GABRA3, GABRA6, SIX3, GRIA4, NRXN1, GABRR3, GRB10, GRM3, GRM8, GRIA1, SALL1, HTR6, LRP2 | 0.007381335 |
| regulation of locomotion  | BMP10, IRS2, ONECUT1, TAC1, LAMA2, VEGFC, S1PR1, SERPINE2, PTK2B, UNC5C, HDAC9, PTENP1, APC                                                                                                            | 0.009085341 |
| response to drug          | GABRE, NES, SLC8A1, GNAO1, ASZ1, ADIPOQ, CTTNBP2, CYP7B1, BDNF, PTK2B, SLC18A1, LRP2, PTENP1, APC                                                                                                      | 0.009175427 |
| regulation of cell motion | BMP10, IRS2, ONECUT1, TAC1, LAMA2, VEGFC, S1PR1, SERPINE2, PTK2B, UNC5C, HDAC9, PTENP1, APC                                                                                                            | 0.009446985 |

**Supplementary Table 3. Hypermethylated Pathways shared by TMX2-11 and TMX2-28 in the gene body**

| <i>Pathway</i>      | <i>Genes</i>                                                                                                                                                                                                                                                                                                                                                                                    | <i>p value</i> |
|---------------------|-------------------------------------------------------------------------------------------------------------------------------------------------------------------------------------------------------------------------------------------------------------------------------------------------------------------------------------------------------------------------------------------------|----------------|
| ion transport       | SLC9A9, KCNIP4, WNT2, KCNQ5, GRIN2B, NMUR2, SLC24A2, ANO2, CHRNA7, KCNQ1, OCA2, GABRG3, KCND2, ATP4B, TRPA1, CACNG3, CNGA2, ATP2C1, RYR3, CLIC6, RYR2, PLLP, SCN11A, KCNH8, KCNH5, SLC38A4, SLC39A12, SCN9A, SCNN1A, GABRQ, GABRE, TRPC4, SLC12A1, GABRA4, KCNB2, GABRA3, ATP11B, GRIA4, CACNA2D3, KCNK2, SLC01B3, GRIA2, GRIA1, SLC17A4, CACNA1H, SCN4B, CACNA1E, HEPH, KCTD16, CACNA1C, CLCN7 | 7.35E-09       |
| metal ion transport | SLC9A9, SLC38A4, SLC39A12, KCNIP4, KCNQ5, GRIN2B, SLC24A2, NMUR2, SCN9A, CHRNA7, KCNQ1, SCNN1A, TRPC4, SLC12A1, KCND2, ATP4B, KCNB2, TRPA1, CACNG3, CACNA2D3, KCNK2, ATP2C1, SLC17A4, RYR3, CACNA1H, SCN4B, RYR2, HEPH, SCN11A, CACNA1E, KCNH8, KCTD16, CACNA1C, KCNH5                                                                                                                          | 4.77E-07       |
| cell adhesion       | DLC1, DCHS2, PLXNC1, PKHD1, NELL1, ASTN1, COL2A1, FPR2, CDH2, SDC3, APLP1, ITGBL1, REG3A, IGSF11, ARHGAP6, COL6A6, FAT3, DGCR6, VNN1, CNTNAP2, COL8A1, ENTPD1, ADAM9, NRXN3, CNTNAP5, NRXN1, BTBD9, CTNNA2, NCAM1, LAMA2, COL19A1, ATP2C1, LSAMP, NLGN4X, ROR2, RELN, SGCE, CNTN4, COL29A1, SELE, CHL1, PARVA                                                                                   | 2.95E-06       |
| biological adhesion | DLC1, DCHS2, PLXNC1, PKHD1, NELL1, ASTN1, COL2A1, FPR2, CDH2, SDC3, APLP1, ITGBL1, REG3A, IGSF11, ARHGAP6, COL6A6, FAT3, DGCR6, VNN1, CNTNAP2, COL8A1, ENTPD1, ADAM9, NRXN3, CNTNAP5, NRXN1, BTBD9, CTNNA2, NCAM1, LAMA2, COL19A1, ATP2C1, LSAMP, NLGN4X, ROR2, RELN, SGCE, CNTN4, COL29A1, SELE, CHL1, PARVA                                                                                   | 3.02E-06       |
| cell-cell signaling | FGF9, FGF14, ILDR2, RIMS1, EPHB1, WNT2, KCNQ5, BDNF, GRIN2B, NMUR2, LTB, BMP2, GABRG3, KCND2, TRHDE, NRXN3, GABRA3, GRIA4, NRXN1, FGF20, TNFSF9, CTNNA2, CAMK4, GRIA2, GRM8, GRIA1, GRM7, ADRA1B, WNT9B,                                                                                                                                                                                        | 1.78E-05       |

|                                                  |                                                                                                                                                                                                                                                                                                                                                                                                                                                                                                  |          |
|--------------------------------------------------|--------------------------------------------------------------------------------------------------------------------------------------------------------------------------------------------------------------------------------------------------------------------------------------------------------------------------------------------------------------------------------------------------------------------------------------------------------------------------------------------------|----------|
|                                                  | ADRA1A, GPR50, CACNA1E, RIT2, LRP2, CACNA1C, WNT7A                                                                                                                                                                                                                                                                                                                                                                                                                                               |          |
| cation transport                                 | SLC9A9, SLC38A4, SLC39A12, KCNIP4, KCNQ5, GRIN2B, SLC24A2, NMUR2, SCN9A, CHRNA7, KCNQ1, SCNN1A, TRPC4, SLC12A1, KCND2, ATP4B, KCNB2, TRPA1, CACNG3, CACNA2D3, KCNK2, ATP2C1, SLC17A4, RYR3, CACNA1H, SCN4B, RYR2, HEPH, SCN11A, CACNA1E, KCNH8, KCTD16, CACNA1C, KCNH5                                                                                                                                                                                                                           | 1.96E-05 |
| multicellular organismal response to stress      | EDNRB, BDNF, GRIN2B, NMUR2, GRM7, TRPA1, SCN9A, RELN                                                                                                                                                                                                                                                                                                                                                                                                                                             | 7.55E-05 |
| transmission of nerve impulse                    | GABRG3, KCND2, GABRA3, NRXN3, NRXN1, GRIA4, RIMS1, CTNNA2, WNT2, KCNQ5, CAMK4, GRIA2, GRIN2B, GRM8, SBF2, GRIA1, NMUR2, GRM7, CNTNAP2, PLLP, CACNA1E, RIT2, CACNA1C, WNT7A                                                                                                                                                                                                                                                                                                                       | 8.78E-05 |
| neurological system process                      | WNT2, KCNQ5, BDNF, GRIN2B, SLC24A2, NMUR2, CNTNAP2, CHRNA7, KCNQ1, IMPDH1, USH2A, GABRG3, OR5R1, KCND2, RAX, OR5M1, NRXN3, TRPA1, OR5M3, NRXN1, OR5M9, CTNNA2, CNGA2, OR5M8, EYA1, LRAT, CAMK4, SBF2, OR2H1, GRM8, GRM7, PLLP, ABLIM1, OR8U8, COL2A1, RIMS1, OR9Q1, OR5AP2, NEFL, SCNN1A, GUCY2F, OR9G9, OR5M10, GABRA3, OR9G1, TBX1, AFF2, GRIA4, FOXP2, GRIA2, GRIA1, ADRA1B, CACNA1E, RIT2, CACNA1C, PBX3, WNT7A                                                                              | 1.01E-04 |
| appendage development                            | MSX2, ALDH1A2, RAX, FGF9, PRRX1, COL2A1, ZBTB16, ASPH, SP8, MECOM, NR2F2, WNT7A                                                                                                                                                                                                                                                                                                                                                                                                                  | 1.10E-04 |
| limb development                                 | MSX2, ALDH1A2, RAX, FGF9, PRRX1, COL2A1, ZBTB16, ASPH, SP8, MECOM, NR2F2, WNT7A                                                                                                                                                                                                                                                                                                                                                                                                                  | 1.10E-04 |
| calcium ion transport                            | TRPC4, TRPA1, CACNG3, CACNA2D3, GRIN2B, ATP2C1, RYR3, SLC24A2, NMUR2, CACNA1H, RYR2, CACNA1E, CHRNA7, CACNA1C                                                                                                                                                                                                                                                                                                                                                                                    | 1.33E-04 |
| cell surface receptor linked signal transduction | FGF9, GPR123, LEPR, ADCY5, PREX2, WNT2, EDNRB, GRIN2B, NMUR2, GAB1, RSPO2, HEY2, NRG1, INSR, ADAM9, GABRG3, OR5R1, OR5M1, CCDC88C, BAIAP2, ARID5B, DLL1, OR5M3, FGF20, OR5M9, OR5M8, NCAM1, CHRDL1, GRM8, OR2H1, GRM7, WNT9B, ROR1, GPR50, ROR2, GAP43, AKAP4, GPRC5C, OR8U8, PKHD1, GNAI1, APH1B, AKAP12, FPR2, EPHB1, OR9Q1, ITGBL1, SORCS3, MSX2, APLNR, DGKB, OR5AP2, BAI3, ENTPD1, GUCY2F, GABRE, OR9G9, PTPRD, BMP2, FLT1, GABRA4, OR5M10, GABRA3, MAML2, SMAD5, OR9G1, DGKK, DGKI, GRIA4, | 1.35E-04 |

|                                            |                                                                                                                                                                                             |          |
|--------------------------------------------|---------------------------------------------------------------------------------------------------------------------------------------------------------------------------------------------|----------|
|                                            | PTGFR, KCNK2, BTLA, NOTCH4, ADRA1B, ADRA1A, BAMBI, WNT7A, ADAMDEC1                                                                                                                          |          |
| response to pain                           | EDNRB, GRIN2B, NMUR2, TRPA1, SCN9A, RELN                                                                                                                                                    | 1.60E-04 |
| neuron differentiation                     | PKHD1, RORA, PRKG1, RTN1, EPHB1, EFHD1, ALDH1A2, BDNF, CNTNAP2, ROBO3, OLFM3, NEFL, NRXN3, STMN2, PTPRZ1, BAIAP2, NTNG1, NRXN1, LMX1A, FGF20, CTNNA2, BTG4, CNTN4, RELN, PBX3, WNT7A, GAP43 | 1.66E-04 |
| muscle organ development                   | POU6F1, ARID5B, UTRN, MYL1, MOV10L1, TBX1, FOXP2, LAMA2, COL19A1, HLX, CACNA1H, VGLL2, ZFPM2, SGCE, NRG1, NR2F2, TCF12                                                                      | 2.15E-04 |
| cell motion                                | ASTN1, ZEB2, CDH2, FPR2, PRKG1, EPHB1, DSTN, WNT2, EDNRB, BDNF, VNN1, CLASP2, ROBO3, NR2F2, FLT1, NRXN3, ARID5B, TBX1, NRXN1, LMX1A, ELMO1, CTNNA2, ETS1, CNTN4, RELN, SELE, GAP43, AKAP4   | 2.50E-04 |
| regulation of system process               | LZTS1, FLT1, KCNB2, CDH2, GRIA4, LAMA2, EDNRB, BDNF, GRIA2, GRIN2B, GRM8, NMUR2, SLC24A2, ADRA1B, CACNA1H, RYR2, CNTN4, PBX3, CACNA1C, KCNQ1, LTB                                           | 3.11E-04 |
| di-, tri-valent inorganic cation transport | TRPC4, TRPA1, CACNG3, CACNA2D3, GRIN2B, ATP2C1, RYR3, SLC24A2, NMUR2, CACNA1H, RYR2, CHRNA7, CACNA1E, HEPH, CACNA1C                                                                         | 3.26E-04 |
| synaptic transmission                      | GABRG3, KCND2, GABRA3, NRXN3, NRXN1, GRIA4, RIMS1, CTNNA2, WNT2, KCNQ5, CAMK4, GRIA2, GRIN2B, GRM8, GRIA1, GRM7, CACNA1E, RIT2, CACNA1C, WNT7A                                              | 5.24E-04 |



**Supplementary Table 4. Genes with two or more hypermethylated CpG sites in the promoter in both TMX2-11 and TMX2-28 in order of decreasing number of hypermethylated CpGs**

| Official Gene Symbol | Number of hypermethylated CpGs | Average fold change TMX2-11 | Average fold change TMX2-28 |
|----------------------|--------------------------------|-----------------------------|-----------------------------|
| EDNRB                | 11                             | 2.44                        | 3.19                        |
| SORBS2               | 7                              | 4.98                        | 7.95                        |
| EVX2                 | 6                              | 3.05                        | 3.70                        |
| ZBTB20               | 6                              | 4.19                        | 5.56                        |
| CXorf67              | 5                              | 3.34                        | 3.08                        |
| MIR568               | 5                              | 4.33                        | 5.19                        |
| ZNF350               | 5                              | 4.63                        | 3.82                        |
| BMP2                 | 4                              | 9.09                        | 9.55                        |
| COL21A1              | 4                              | 4.62                        | 7.30                        |
| CSGALNACT1           | 4                              | 2.88                        | 5.56                        |
| CXCL2                | 4                              | 6.35                        | 16.98                       |
| FMO6P                | 4                              | 2.24                        | 2.52                        |
| RGS13                | 4                              | 3.00                        | 3.50                        |
| ZNF385B/MIR1258      | 4                              | 5.90                        | 9.33                        |
| ASZ1                 | 3                              | 2.44                        | 2.94                        |
| C18orf20             | 3                              | 2.67                        | 3.05                        |
| CHRD1                | 3                              | 2.30                        | 2.55                        |
| COL29A1              | 3                              | 5.17                        | 4.29                        |
| COX7B2               | 3                              | 2.67                        | 3.98                        |
| DGKK                 | 3                              | 2.39                        | 2.70                        |
| ELAVL4               | 3                              | 3.66                        | 5.16                        |
| FAM55D               | 3                              | 4.69                        | 9.05                        |
| GFI1                 | 3                              | 4.98                        | 7.07                        |
| HDAC9                | 3                              | 2.56                        | 3.92                        |
| HOXB9                | 3                              | 2.67                        | 3.94                        |
| LOC284688            | 3                              | 3.39                        | 3.93                        |
| LZTS1                | 3                              | 3.49                        | 4.67                        |
| MAGEA5               | 3                              | 3.44                        | 5.32                        |
| MIR452               | 3                              | 4.03                        | 2.87                        |
| MIR54814             | 3                              | 3.35                        | 5.59                        |
| MOV10L1              | 3                              | 2.32                        | 4.45                        |
| OR2M5                | 3                              | 2.63                        | 6.26                        |
| PAK3                 | 3                              | 2.63                        | 2.75                        |
| PRKCDBP              | 3                              | 2.26                        | 2.36                        |
| VANGL2               | 3                              | 5.57                        | 7.40                        |
| ZNF215               | 3                              | 4.96                        | 10.56                       |
| ZNF22                | 3                              | 3.51                        | 3.87                        |
| ACTL9                | 2                              | 3.00                        | 3.49                        |
| AKAP12               | 2                              | 2.30                        | 2.40                        |
| ALDH3A1              | 2                              | 2.06                        | 2.95                        |
| ASCL2                | 2                              | 2.18                        | 3.45                        |
| BMP15                | 2                              | 3.96                        | 4.14                        |
| C6orf64              | 2                              | 3.49                        | 4.92                        |
| CDC14C               | 2                              | 4.28                        | 4.25                        |
| CDKL2                | 2                              | 2.49                        | 2.38                        |
| CEACAM18             | 2                              | 3.03                        | 6.18                        |
| CNGA2                | 2                              | 6.83                        | 7.06                        |
| COL6A6               | 2                              | 3.55                        | 3.12                        |
| CXCL5                | 2                              | 2.96                        | 2.76                        |
| DEFB115              | 2                              | 2.86                        | 4.38                        |
| DEFB116              | 2                              | 4.44                        | 8.06                        |
| DEFB118              | 2                              | 2.18                        | 2.53                        |
| FAM151B              | 2                              | 2.25                        | 2.83                        |
| FAM19A4              | 2                              | 5.55                        | 4.79                        |
| FAM55A               | 2                              | 3.18                        | 6.89                        |
| FPR2                 | 2                              | 2.44                        | 3.61                        |
| FSHR                 | 2                              | 2.66                        | 2.74                        |
| GABRE                | 2                              | 2.97                        | 2.77                        |
| GAP43                | 2                              | 4.87                        | 4.37                        |
| GLYATL1              | 2                              | 2.17                        | 3.45                        |

|           |   |       |       |
|-----------|---|-------|-------|
| GRB10     | 2 | 3.40  | 5.56  |
| GRM3      | 2 | 3.19  | 3.93  |
| GRM8      | 2 | 2.15  | 3.38  |
| GRXCR1    | 2 | 2.61  | 3.76  |
| GUCY1A2   | 2 | 5.19  | 8.96  |
| HCG4      | 2 | 2.60  | 3.36  |
| HELT      | 2 | 4.80  | 3.55  |
| HS3ST1    | 2 | 5.88  | 10.5  |
| IL17A     | 2 | 2.38  | 2.55  |
| IL17F     | 2 | 2.23  | 2.41  |
| KCNIP4    | 2 | 2.75  | 3.93  |
| KCNJ4     | 2 | 2.20  | 2.44  |
| KRTAP11-1 | 2 | 2.80  | 4.67  |
| KRTAP27-1 | 2 | 2.44  | 4.55  |
| LOC441666 | 2 | 2.19  | 2.14  |
| LOC728640 | 2 | 2.29  | 2.80  |
| LRP2      | 2 | 4.87  | 3.04  |
| MAGEA10   | 2 | 2.82  | 3.87  |
| MAGED1    | 2 | 3.56  | 5.58  |
| MAP3K15   | 2 | 6.48  | 5.50  |
| MAPRE2    | 2 | 2.67  | 2.85  |
| METTL11B  | 2 | 2.88  | 3.12  |
| MIR105-1  | 2 | 6.28  | 6.03  |
| MIR548F3  | 2 | 3.81  | 5.46  |
| MIR592    | 2 | 3.42  | 4.53  |
| MIR921    | 2 | 2.66  | 3.32  |
| MOXD2     | 2 | 3.11  | 4.64  |
| MS4A13    | 2 | 2.17  | 3.31  |
| MS4A4A    | 2 | 2.06  | 3.14  |
| MS4A6A    | 2 | 2.15  | 3.14  |
| MTUS2     | 2 | 3.09  | 4.55  |
| OR1S1     | 2 | 5.29  | 6.93  |
| OR2J2     | 2 | 2.73  | 3.15  |
| OR4D6     | 2 | 2.59  | 3.37  |
| OR5AS1    | 2 | 2.18  | 4.25  |
| OR5B12    | 2 | 11.67 | 17.35 |
| OR5E1P    | 2 | 3.25  | 6.42  |
| OR5H15    | 2 | 2.69  | 4.28  |
| OR5P3     | 2 | 4.93  | 10.71 |
| OR5V1     | 2 | 3.80  | 6.60  |
| OR5W2     | 2 | 3.06  | 2.57  |
| OR8H3     | 2 | 2.92  | 2.70  |
| PPBP      | 2 | 2.78  | 4.04  |
| PRKG2     | 2 | 2.85  | 3.59  |
| REG1A     | 2 | 2.31  | 4.19  |
| REG1B     | 2 | 3.44  | 5.86  |
| RORA      | 2 | 3.00  | 2.46  |
| SGIP1     | 2 | 2.10  | 3.13  |
| SIX3      | 2 | 3.26  | 7.35  |
| SLC1A4    | 2 | 7.09  | 9.10  |
| SLC35F4   | 2 | 2.88  | 5.10  |
| SLC46A1   | 2 | 2.16  | 2.22  |
| SSRP1     | 2 | 3.29  | 6.83  |
| TAC1      | 2 | 2.30  | 3.36  |
| TCF12     | 2 | 2.77  | 4.32  |
| TIGIT     | 2 | 2.70  | 2.45  |
| UNC5D     | 2 | 2.15  | 2.52  |
| ZNF396    | 2 | 4.21  | 4.36  |
| ZNF615    | 2 | 2.56  | 4.01  |
| ZSCAN18   | 2 | 2.45  | 2.23  |

\* Average fold change is calculated from all CpG sites with a fold change >2 and an average beta value of >0.3 within the promoter region.
